# Supplementary material for: Assessment of megabase-scale somatic copy number variation using single-cell sequencing
Source: HighWire-hosted journal article supplement (doi:10.1101/gr.198937.115), 2016-01-15
Supplement: Supplemental_Table1.docx [file Supplemental_Table1.docx]

| **Individual** | **Age** | **Sex** | **Tissue** | **Total Cells Sequenced** |
| --- | --- | --- | --- | --- |
| 130412 | 70 | M | Brain | 20 |
| 130604 | 52 | M | Brain | 22 |
| 140131 | 48 | F | Brain | 26 |
| Skin | 30 |
| 140213 | 68 | M | Brain | 37 |
| Skin | 25 |

**Supplemental Table 1. Description of Dataset**
