# Supplementary material for: Assessment of megabase-scale somatic copy number variation using single-cell sequencing
Source: HighWire-hosted journal article supplement (doi:10.1101/gr.198937.115), 2016-01-15
Supplement: Supplemental_Table2.docx [file Supplemental_Table2.docx]

**Supplemental Table 2. CNVs Identified in Somatic Cells**

| **Individual** | **Tissue** | **Cell**  **(VS)** | **Chr** | **Start (Mb)** | **End (Mb)** | **Length (Mb)** | **Type** |
| --- | --- | --- | --- | --- | --- | --- | --- |
| 130412 | Brain | 1780  (0.19) | 22 | 0.00 | 51.18 | 51.18 | L |
| 1783  (0.22) | 1 | 245.72 | 248.32 | 2.60 | L |
| 8 | 13.36 | 20.92 | 7.56 | L |
| 18 | 0.00 | 3.20 | 3.20 | L |
| 1785  (0.16) | 6 | 0.00 | 3.65 | 3.65 | L |
| 1786  (0.22) | 3 | 161.03 | 189.92 | 28.89 | L |
| 4 | 99.84 | 104.26 | 4.42 | L |
| 5 | 0.00 | 6.55 | 6.55 | L |
| 6 | 127.40 | 132.69 | 5.29 | L |
| 13 | 66.00 | 74.58 | 8.58 | L |
| 18 | 62.51 | 71.07 | 8.56 | L |
| 130604 | Brain | 2595  (0.19) | 8 | 0.00 | 4.41 | 4.41 | L |
| 2607  (0.17) | 8 | 0.00 | 4.96 | 4.96 | L |
| 140131 | Skin | 692  (0.24) | 2 | 143.27 | 148.36 | 5.09 | L |
| 696  (0.19) | 5 | 46.32 | 180.72 | 134.40 | G |
| 698  (0.25) | 2 | 0.00 | 8.27 | 8.27 | L |
| 8 | 0.00 | 6.11 | 6.11 | L |
| 8 | 136.00 | 141.00 | 5.00 | L |
| 9 | 120.00 | 122.50 | 2.50 | L |
| 19 | 28.42 | 32.50 | 4.08 | L |
| 140213 | Brain | 962  (0.24) | 4 | 156.00 | 163.00 | 7.00 | L |
| 5 | 0.00 | 8.33 | 8.33 | L |
| Skin | 988  (0.21) | 9 | 117.50 | 120.50 | 3.00 | G |
