# Supplementary material for: Assessment of megabase-scale somatic copy number variation using single-cell sequencing
Source: HighWire-hosted journal article supplement (doi:10.1101/gr.198937.115), 2016-01-15
Supplement: Supplemental_Table3.docx [file Supplemental_Table3.docx]

| **Individual** | **Tissue** | **Cell**  **(VS)** | **Low (~0.1X) Coverage** | | | | | **Higher (~1X) Coverage** | | | | |
| --- | --- | --- | --- | --- | --- | --- | --- | --- | --- | --- | --- | --- |
| **Chr** | **Start (Mb)** | **End (Mb)** | **Length (Mb)** | **Type** | **Chr** | **Start (Mb)** | **End (Mb)** | **Length (Mb)** | **Type** |
| 130412 | Brain | 1783  (0.22) | 1 | 245.72 | 248.32 | 2.60 | L | 1 | 245.67 | 248.32 | 2.65 | L |
|  |  |  |  |  | 4 | 77.89 | 79.73 | 1.84 | L |
| 8 | 13.36 | 20.92 | 7.56 | L | 8 | 13.36 | 20.36 | 7.00 | L |
| 18 | 0.00 | 3.20 | 3.20 | L | 18 | 0.00 | 4.00 | 4.00 | L |
| 1786  (0.22) |  |  |  |  |  | 3 | 87.15 | 90.18 | 3.03 | L |
| 3 | 161.03 | 189.92 | 28.89 | L | 3 | 161.04 | 189.92 | 28.88 | L |
| 4 | 99.84 | 104.26 | 4.42 | L | 4 | 99.84 | 104.27 | 4.43 | L |
| 5 | 0.00 | 6.55 | 6.55 | L | 5 | 0.00 | 6.55 | 6.55 | L |
| 6 | 127.40 | 132.69 | 5.29 | L |  |  |  |  |  |
|  |  |  |  |  | 7 | 131.91 | 134.19 | 2.28 | L |
| 13 | 66.00 | 74.58 | 8.58 | L | 13 | 66.00 | 74.59 | 8.590 | L |
| 18 | 62.51 | 71.07 | 8.56 | L | 18 | 62.51 | 71.07 | 8.56 | L |
| 140131 | Brain | 667  (0.20) |  |  |  |  |  |  |  |  |  |  |
| Skin | 696  (0.19) | 5 | 46.32 | 180.72 | 134.40 | G | 5 | 46.32 | 180.72 | 134.40 | G |
| 698  (0.25) | 2 | 0.00 | 8.27 | 8.27 | L | 2 | 0.00 | 8.00 | 8.00 | L |
| 8 | 0.00 | 6.11 | 6.11 | L | 8 | 0.00 | 6.11 | 6.11 | L |
| 8 | 136.00 | 141.00 | 5.00 | L | 8 | 136.00 | 141.00 | 5.00 | L |
| 9 | 120.00 | 122.50 | 2.50 | L |  |  |  |  |  |
| 19 | 28.42 | 32.50 | 4.08 | L | 19 | 28.42 | 32.50 | 4.08 | L |
|  |  |  |  |  | 20 | 7.50 | 9.50 | 2.00 | L |
| 701  (0.25) |  |  |  |  |  |  |  |  |  |  |

**Supplemental Table 3. CNVs Identified in Somatic Cells at Low (~0.1X) and High (~1X) Coverage**

Appeared at higher coverage Disappeared at higher coverage
